# Supplementary material for: Mutations within the cGMP-binding domain of CNGA1 causing autosomal recessive retinitis pigmentosa in human and animal model
Source: bioRxiv or medRxiv preprint supplement (doi:10.1101/2022.08.10.22278420), 2022-08-12

Sup-Fig3

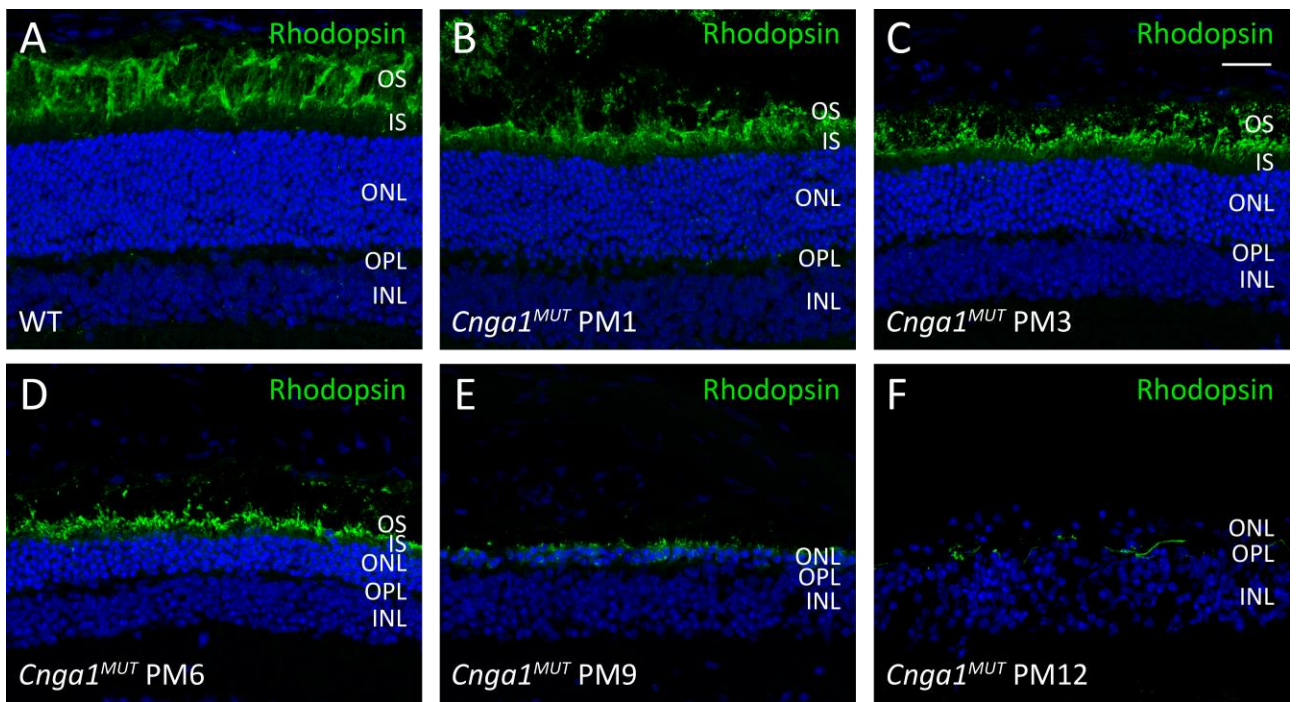

Supplement: Supplementary file [file media-3.pdf]
