# Supplementary material for: Mutations within the cGMP-binding domain of CNGA1 causing autosomal recessive retinitis pigmentosa in human and animal model
Source: bioRxiv or medRxiv preprint supplement (doi:10.1101/2022.08.10.22278420), 2022-08-12
Supplement: Supplementary file [file media-4.pdf]

## Supplementary Tables of the Manuscript

**Supplementary Table 1 - Retinal Degeneration Panel (105 Genes)**

|               |                 |                |               |                |                |                 |
|---------------|-----------------|----------------|---------------|----------------|----------------|-----------------|
| <i>ABCA4</i>  | <i>BEST1</i>    | <i>DHDDS</i>   | <i>IMPG2</i>  | <i>OTX2</i>    | <i>RBP3</i>    | <i>SAG</i>      |
| <i>ADAM9</i>  | <i>C2ORF71</i>  | <i>EYS</i>     | <i>IQCB1</i>  | <i>PDE6A</i>   | <i>RD3</i>     | <i>SEMA4A</i>   |
| <i>AIPL1</i>  | <i>CA4</i>      | <i>FAM161A</i> | <i>KCNJ13</i> | <i>PDE6B</i>   | <i>RDH12</i>   | <i>SLC24A1</i>  |
| <i>BBS1</i>   | <i>CABP4</i>    | <i>FSCN2</i>   | <i>KCNV2</i>  | <i>PDE6C</i>   | <i>RDH5</i>    | <i>SNRNP200</i> |
| <i>BBS10</i>  | <i>CACNA2D4</i> | <i>GNAT1</i>   | <i>KLHL7</i>  | <i>PDE6G</i>   | <i>RGR</i>     | <i>SPATA7</i>   |
| <i>TRIM32</i> | <i>CACNA1F</i>  | <i>GNAT2</i>   | <i>LCA5</i>   | <i>PITPNM3</i> | <i>RHO</i>     | <i>TOPORS</i>   |
| <i>BBS12</i>  | <i>CDHR1</i>    | <i>GPR143</i>  | <i>LRAT</i>   | <i>PRCD</i>    | <i>RIMS1</i>   | <i>TRPM1</i>    |
| <i>MKS1</i>   | <i>CERKL</i>    | <i>GPR179</i>  | <i>LRIT3</i>  | <i>PROM1</i>   | <i>RLBP1</i>   | <i>TTC8</i>     |
| <i>CEP290</i> | <i>CLRN1</i>    | <i>GRM6</i>    | <i>MERTK</i>  | <i>PRPF3</i>   | <i>ROM1</i>    | <i>TULP1</i>    |
| <i>BBS2</i>   | <i>CNGA1</i>    | <i>GRK1</i>    | <i>MKKS</i>   | <i>PRPF31</i>  | <i>RP1</i>     | <i>UNC119</i>   |
| <i>ARL6</i>   | <i>CNGA3</i>    | <i>GUCA1A</i>  | <i>NMNAT1</i> | <i>PRPF6</i>   | <i>RP2</i>     | <i>USH2A</i>    |
| <i>BBS4</i>   | <i>CNGB1</i>    | <i>GUCA1B</i>  | <i>NR2E3</i>  | <i>PRPF8</i>   | <i>RP9</i>     | <i>ZNF513</i>   |
| <i>BBS5</i>   | <i>CNGB3</i>    | <i>GUCY2D</i>  | <i>NRL</i>    | <i>PRPH2</i>   | <i>RPE65</i>   | <i>EFEMP1</i>   |
| <i>BBS7</i>   | <i>CRB1</i>     | <i>IDH3B</i>   | <i>NYX</i>    | <i>RAX2</i>    | <i>RPGR</i>    | <i>PITX2</i>    |
| <i>BBS9</i>   | <i>CRX</i>      | <i>IMPDH1</i>  | <i>OAT</i>    | <i>RB1</i>     | <i>RPGRIP1</i> | <i>FOXC1</i>    |
