# Supplementary material for: Mutations within the cGMP-binding domain of CNGA1 causing autosomal recessive retinitis pigmentosa in human and animal model
Source: bioRxiv or medRxiv preprint supplement (doi:10.1101/2022.08.10.22278420), 2022-08-12
Supplement: Supplementary file [file media-5.pdf]

**Supplementary Table 2 - Primers used in this study**

| <b>Primer</b>        | <b>Sequence (5'- 3')</b> | <b>Ta<br/>(°C)</b> | <b>Amplicon<br/>size (bp)</b> |
|----------------------|--------------------------|--------------------|-------------------------------|
| <i>CNGA1-Ex-10-F</i> | GTATATCGTCATCATTATCCACTG | 60                 | 855                           |
| <i>CNGA1-Ex-10-R</i> | TCTGGGTACTCAGTTAGAGC     |                    |                               |
| <i>Cngal-Ex-9-F</i>  | TGAGAGAGAAGTCCTGAGATAACC | 63                 | 400                           |
| <i>Cngal-Ex-9-R</i>  | TGAGGTCATCTTTGGAGAGGC    |                    |                               |
